# Supplementary material for: Large-Scale Genotyping-by-Sequencing Indicates High Levels of Gene Flow in the Deep-Sea Octocoral Swiftia simplex (Nutting 1909) on the West Coast of the United States
Source: PLoS One. 2016 Oct 31;11(10):e0165279. doi: 10.1371/journal.pone.0165279 (PMC5087884; doi:10.1371/journal.pone.0165279)
Supplement: S1 Table — (XLSX) [file pone.0165279.s002.xlsx]

## Sheet: Supplement Table 1.
Reference species	Accession Numbers (COI, MutS)
Acanthogorgia sp.	KX904963, KX904969
Acanthogorgia gracillima	KX904961, KX904967
Acanthoptilum gracile	JN866544.1, KF874205.1
Adelogorgia phyllosclera	JN866558.1, KF874217.1
Anthoptilum grandiflorum	JN866527.1, KF874186.1
Callogorgia sp.	KX904959, KX904977
Eugorgia rubens	JN866557.1, KF874216.1
Chromoplexaura markii	KX904954, KX904972
Funiculina quadrangularis	JN866526.1, KF874185.1
Halipteris willemoesi	JN866543.1, KF874204.1
Leptogorgia chilensis	JN866554.1, KF874214.1
Parastenella ramosa	KX904965, KX904971
Pennatula phosphorea	KX904957, KX904975
Plumarella longispina	KX904956, KX904974
Primnoa pacifica	KX904964, KX904970
Ptilosarcus gurneyi	JN866536.1, KF874195.1
Swiftia kofoidi	KX904960, KX904966
Swiftia kofoidi	KX904962, KX904968
Swiftia pacifica	JN866550.1, KF874210.1
Swiftia pacifica	KX904955, KX904973
Swiftia pacifica	KX904958, KX904976
Swiftia simplex	KX904985, KX905008
Swiftia simplex	KX904980, KX905018
Umbellula	JN866559.1, KF874219.1
Umbellula	JN866563.1, KF874199.1
